# Supplementary material
Source: HighWire-hosted journal article supplement (https://dmd.aspetjournals.org/highwire/filestream/77943/field_highwire_adjunct_files/0/597SupplData.pdf)
Supplement: 597SupplData.pdf [file 597SupplData.pdf]

**Manuscript number: DMD-AR-2021-000597R1**

**Title:** Factors Influencing Luciferase-Based Bioluminescent Imaging in Preclinical Models of Brain Tumor

**Authors:** Minjee Kim<sup>1</sup>, Shiv K. Gupta<sup>2</sup>, Wenjuan Zhang<sup>1</sup>, Surabhi Talele<sup>1</sup>, Afroz S. Mohammad<sup>1</sup>, Janice Laramy<sup>1</sup>, Ann C. Mladek<sup>2</sup>, Jann N. Sarkaria<sup>2</sup>, and William F. Elmquist<sup>1</sup>

## Supplemental Figures

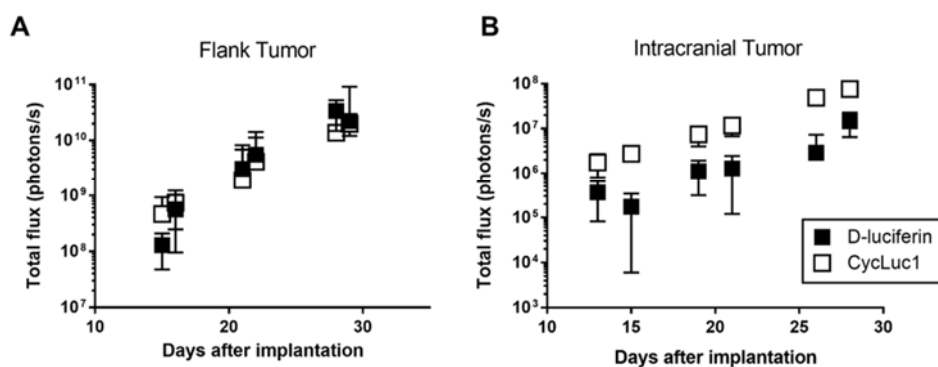

Figure S1. The intensity of BLI light signal from D-luciferin and CycLuc1 with different orders of cross-over imaging with GBM6 implanted on the different locations, flank and brain.

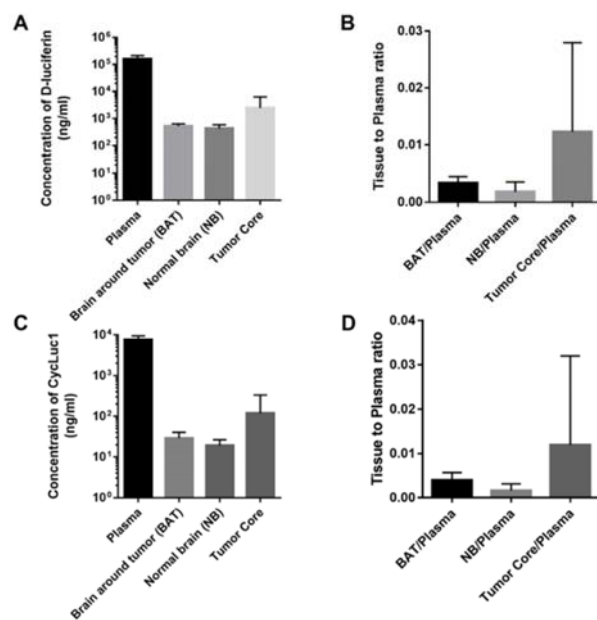

Figure S2. Concentration of D-luciferin (A and B) and CycLuc1 (C and D) measured by LC-MS/MS in and around the brain tumor following a single intraperitoneal dose of 150 mg/kg D-luciferin and 5 mg/kg CycLuc1. Tissues were harvested at 10 min post dosing.

Table S1

Summary of physicochemical properties of D-luciferin and CycLuc1

|                                                   | D-luciferin                                                                       | CycLuc1                                                                             |
|---------------------------------------------------|-----------------------------------------------------------------------------------|-------------------------------------------------------------------------------------|
| Structure                                         | 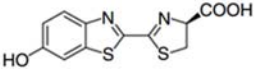 |  |
| Molecular Weight <sup>1</sup>                     | 280.32                                                                            | 305.37                                                                              |
| XLogP <sup>1</sup>                                | 0.9                                                                               | 2.6                                                                                 |
| Hydrogen bond donor count <sup>1</sup>            | 2                                                                                 | 2                                                                                   |
| Hydrogen bond acceptor count <sup>1</sup>         | 7                                                                                 | 7                                                                                   |
| Polar surface area (Å <sup>2</sup> ) <sup>1</sup> | 129                                                                               | 128                                                                                 |
| Emission wavelength (nm) <sup>2</sup>             | 553                                                                               | 603                                                                                 |
| K <sub>m</sub> (μM) <sup>2</sup>                  | 6.76±0.3                                                                          | 0.1±0.01                                                                            |

<sup>1</sup>Pubchem (<https://pubchem.ncbi.nlm.nih.gov/>)<sup>2</sup>Harwood, Katryn R., et al. "Identification of mutant firefly luciferases that efficiently utilize animoluciferins." Chemistry & biology 18.12 (2011): 1649-1657.
